# Supplementary material
Source: publisher figshare collection journal article supplement (https://karger.figshare.com/ndownloader/files/35099713)
Supplement: Supplementary file 1 [file 35099713]

## Sheet: Suppl. Table 1
			Supplementary Table S1. The selected Kampo formulae at the first consultation
Number prescribed	Pharm. Company	Standard daily dosage	Formula name in English	Formula name in Japanese	Cnidium Rhizome	Peony Root	Glycyrrhiza Root	Angerica Root	Ginger	Rehmannia Root	Scutellaria Root	Gardenia Fruit	Coptis Rhizome	Saposhnikovia Root	Phellodendron Bark	Schizonepeta Spike	Forsythia Fruit	Cinnamon Bark	Astragalus Root	Platycodon Root	Jujube	Poria Sclerotium	Atractylodes lancea Rhizome	Bupleurum Root	Mentha Herb Japanese Mint	Koi	Aralia Rhizome	Quercus Bark	Coix Seed	Rhubarb	Evodia Fruit	Alisma Rhizome	Polygonum Root	Tribulus Fruit	Burdock Fruit	Trichosanthes Seed	Lonicera Leaf and Stem	Safflower	Donkey Glue	Red Ginseng	Ophiopogon Tuber	Pinellia Tuber	Moutan Bark	Angelica dahurica Root	Asiasarum Root	Akebia Stem	Clematis Root	Notopterygium Rhizome	Achyranthes Root
7	Kracie Pharm. Co.	6.0g	Unsei’in	温清飲	7	7		7		7	7	7	7		7
3	Tsumura Co.	18.0g	Ogikenchuto	黄耆建中湯		3	3		3									3	3		3					3
3	Tsumura Co.	7.5g	Jumihaidokuto	十味敗毒湯	3		3		3					3		3	3			3		3		3			3	3
2	Tsumura Co.	7.5g	Tokishakuyakusan	当帰芍薬散	2	2		2														2	2									2
2	Tsumura Co.	7.5g	Toki’inshi	当帰飲子	2	2	2	2		2				2		2			2						2								2	2	2	2
2	Tsumura Co.	7.5g	Saikoseikanto	柴胡清肝湯	2	2	2	2		2	2	2	2		2		2			2				2
2	Toyo-yakuko Co.	6.0g	Keishikaogito	桂枝加黄耆湯		2	2		2									2	2		2
2	Tsumura Co.	7.5g	Jizuso’ippo	治頭瘡一方	2		2							2		2	2						2							2							2	2
2	Tsumura Co.	7.5g	Unkeito	温経湯	2	2	2	2	2									2													2								2	2	2	2	2
1	Tsumura Co.	7.5g	Tokishigyakukagosyuyusyokyoto	当帰四逆加呉茱萸生姜湯		1	1	1	1									1			1										1														1	1
1	Tsumura Co.	7.5g	Sokeikakketsuto	疎経活血湯	1	1	1	1	1	1				1								1	1																					1			1	1	1
1	Tsumura Co.	7.5g	Bofutsushosan	防風通聖散	1	1	1	1	1		1	1		1		1	1			1			1		1					1
1	Tsumura Co.	7.5g	Seijobofuto	清上防風湯	1		1				1	1	1	1		1	1			1					1																			1
1	Tsumura Co.	7.5g	Sanmotsu‘ogonto	三物黄芩湯						1	1
Total number of participants; 28			Number used for the participants		23	23	20	18	13	13	12	11	10	10	9	9	9	8	7	7	6	6	6	5	4	3	3	3	0	3	3	2	2	2	2	2	2	2	2	2	2	2	2	2	1	1	1	1	1
					The number in each cell represents the number used for the participants. For example, Cnidium rhizome was contained in unsei'in, which was used for seven participants as shown in cell no. F4.
[truncated: 10 more columns]
